# Supplementary material
Source: publisher figshare collection journal article supplement (https://acs.figshare.com/ndownloader/files/23728941)
Supplement: Supplementary file 1 [file 23728941]

## Supporting Information

### Atomic-Layer-Deposition Process Enabled Carrier Mobility Boosting in Field-Effect Transistors through a Nanoscale ZnO/IGO Heterojunction

*Hyeon Joo Seul,<sup>†</sup> Min Jae Kim,<sup>†</sup> Hyun Ji Yang,<sup>†</sup> Min Hoe Cho,<sup>†</sup> Min Hee Cho,<sup>‡</sup> Woo-Bin Song<sup>‡</sup> and Jae Kyeong Jeong<sup>\*,†</sup>*

<sup>†</sup>Department of Electronic Engineering, Hanyang University, Seoul 04763, South Korea

<sup>‡</sup> Semiconductor R&D Center, Samsung Electronics Co., 1, Samsungjeonja-ro, Hawseong-si, Gyeonggi-do, 18448, Korea

AUTHOR EMAIL ADDRESS: J. K. Jeong ([jkjeong1@hanyang.ac.kr](mailto:jkjeong1@hanyang.ac.kr))

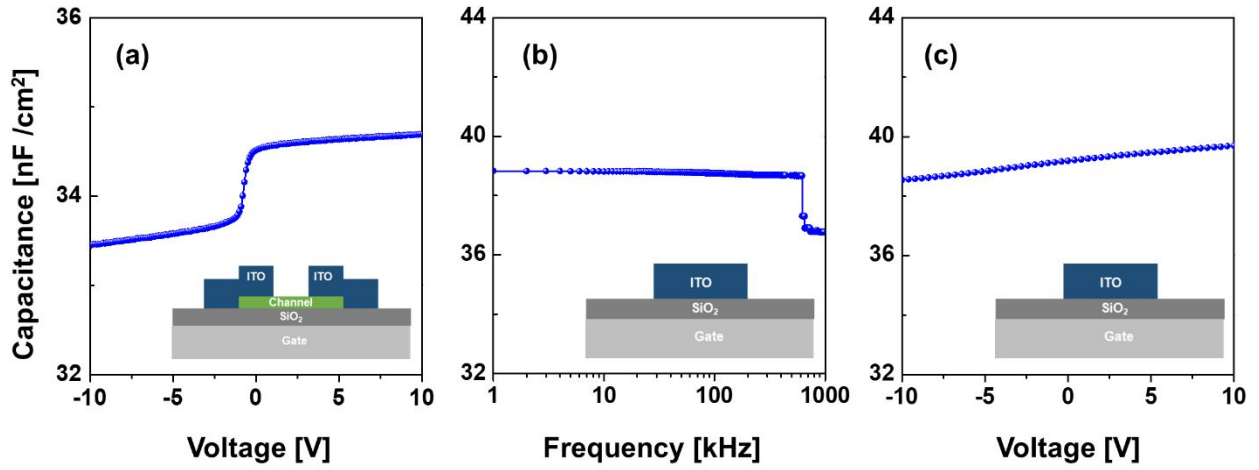

**Figure S1.** (a) Variations in areal capacitance as a function of gate voltage for the oxide FET device where the source and drain electrode are grounded. (b) Frequency and (c) voltage-dependent areal capacitances for the MIM capacitor with 100-nm-thick SiO<sub>2</sub> dielectric layer.

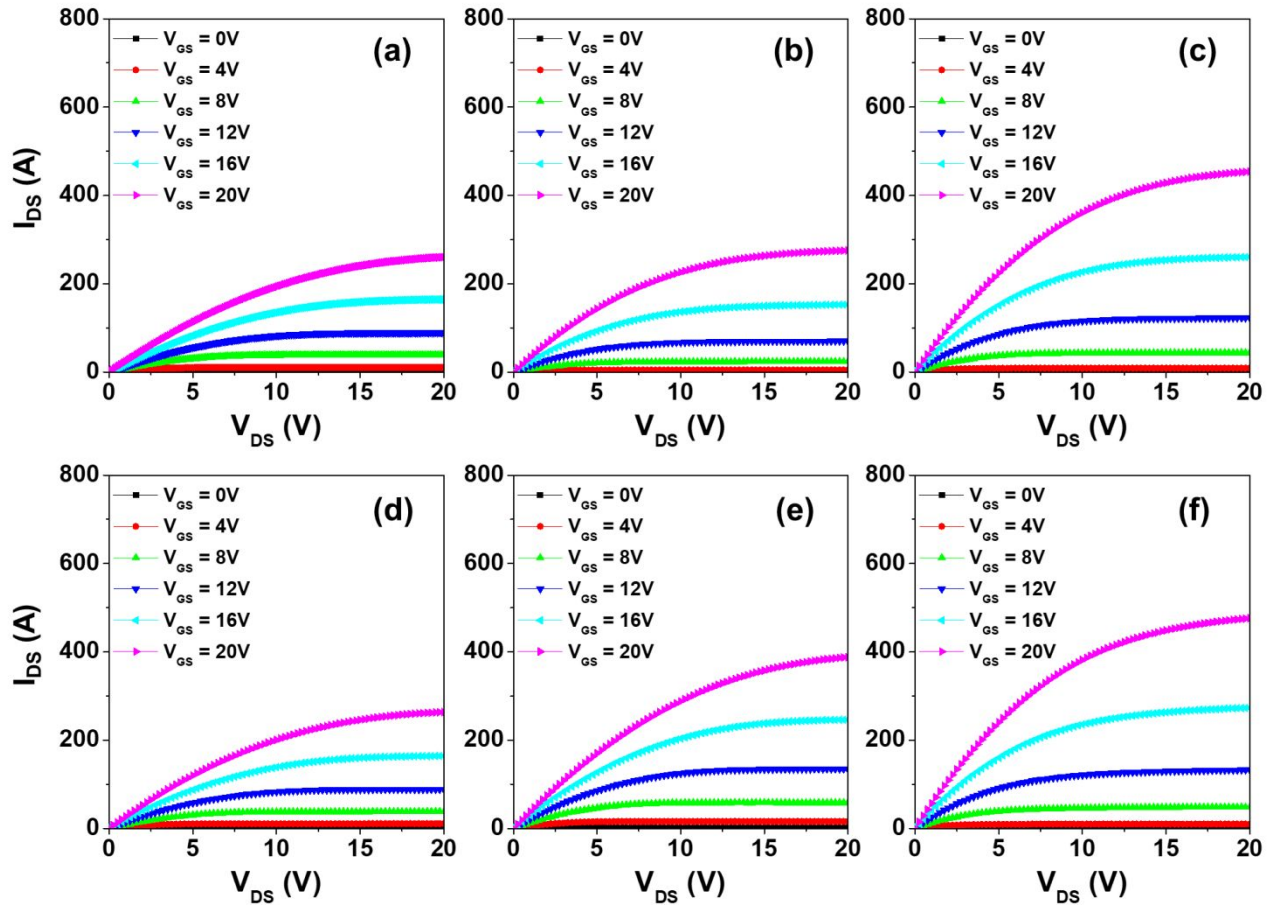

**Figure S2.** Corresponding output characteristics of FETs with (a)  $\text{In}_{0.65}\text{Ga}_{0.35}\text{O}_{1.5}$ , (b)  $\text{In}_{0.75}\text{Ga}_{0.25}\text{O}_{1.5}$ , (c)  $\text{In}_{0.83}\text{Ga}_{0.17}\text{O}_{1.5}$ , (d)  $\text{ZnO}/\text{In}_{0.65}\text{Ga}_{0.35}\text{O}_{1.5}$ , (e)  $\text{ZnO}/\text{In}_{0.75}\text{Ga}_{0.25}\text{O}_{1.5}$ , and (f)  $\text{ZnO}/\text{In}_{0.83}\text{Ga}_{0.17}\text{O}_{1.5}$ .

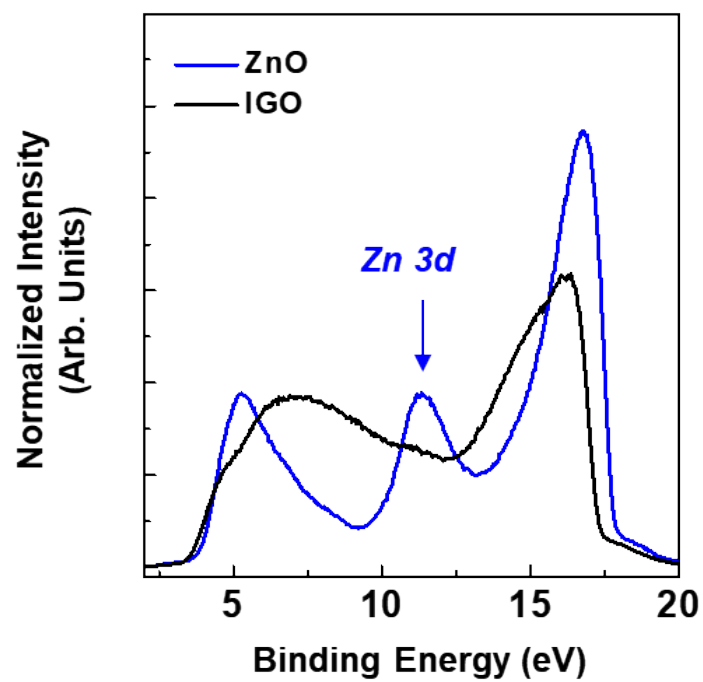

**Figure S3.** UPS spectra of ZnO and IGO thin film samples.

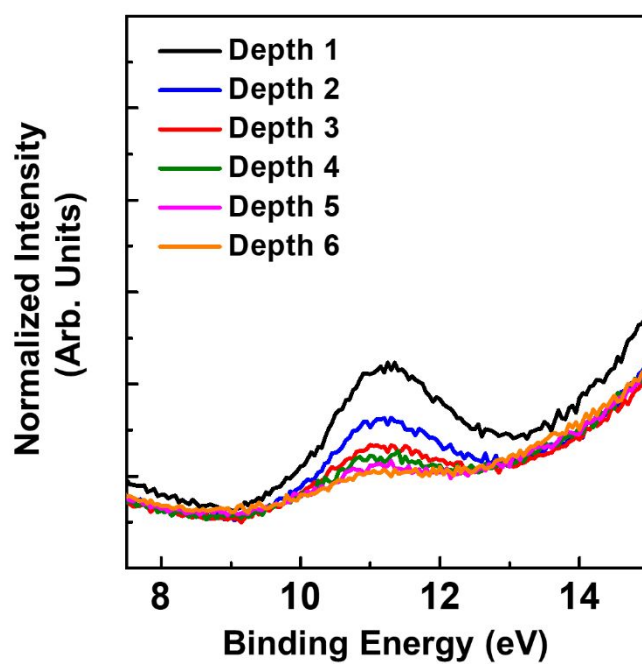

**Figure S4.** Zn 3d core-level emissions of ZnO/In<sub>0.83</sub>Ga<sub>0.17</sub>O<sub>1.5</sub> at different depths, based on UPS depth analysis.



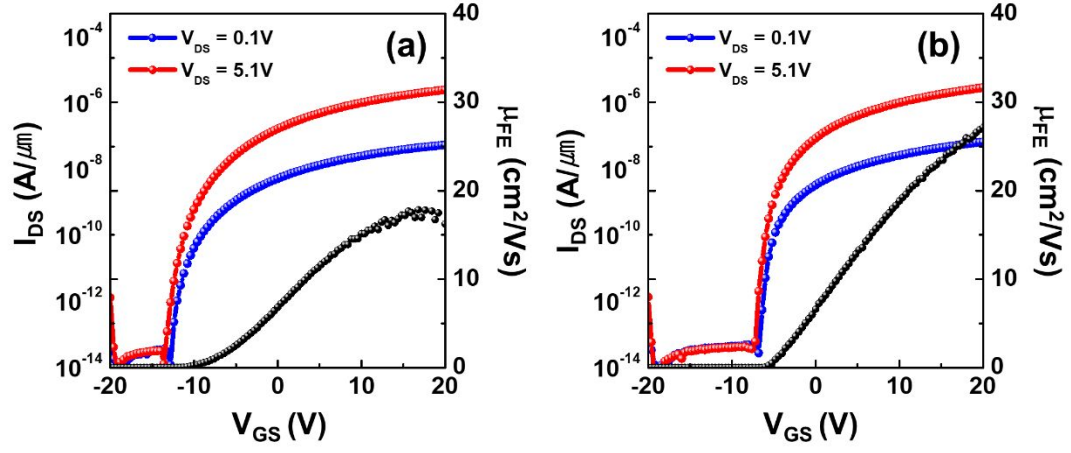

| Sample                             | $\mu_{FE}$<br>( $\text{cm}^2/\text{V s}$ ) | $SS$<br>( $\text{V/decade}$ ) | $V_{TH}$<br>( $\text{V}$ ) | $I_{ON/OFF}$ |
|------------------------------------|--------------------------------------------|-------------------------------|----------------------------|--------------|
| $\text{In}_2\text{O}_3$            | $20.0 \pm 2.1$                             | $0.92 \pm 0.13$               | $-12.0 \pm 0.58$           | $\sim 10^8$  |
| $\text{ZnO}/\text{In}_2\text{O}_3$ | $27.1 \pm 3.6$                             | $0.49 \pm 0.21$               | $-5.41 \pm 0.36$           | $\sim 10^8$  |

**Figure S6.** Transfer characteristics and electrical parameters of FETs with (a)  $\text{In}_2\text{O}_3$  and (b)  $\text{ZnO}/\text{In}_2\text{O}_3$  channel layers.

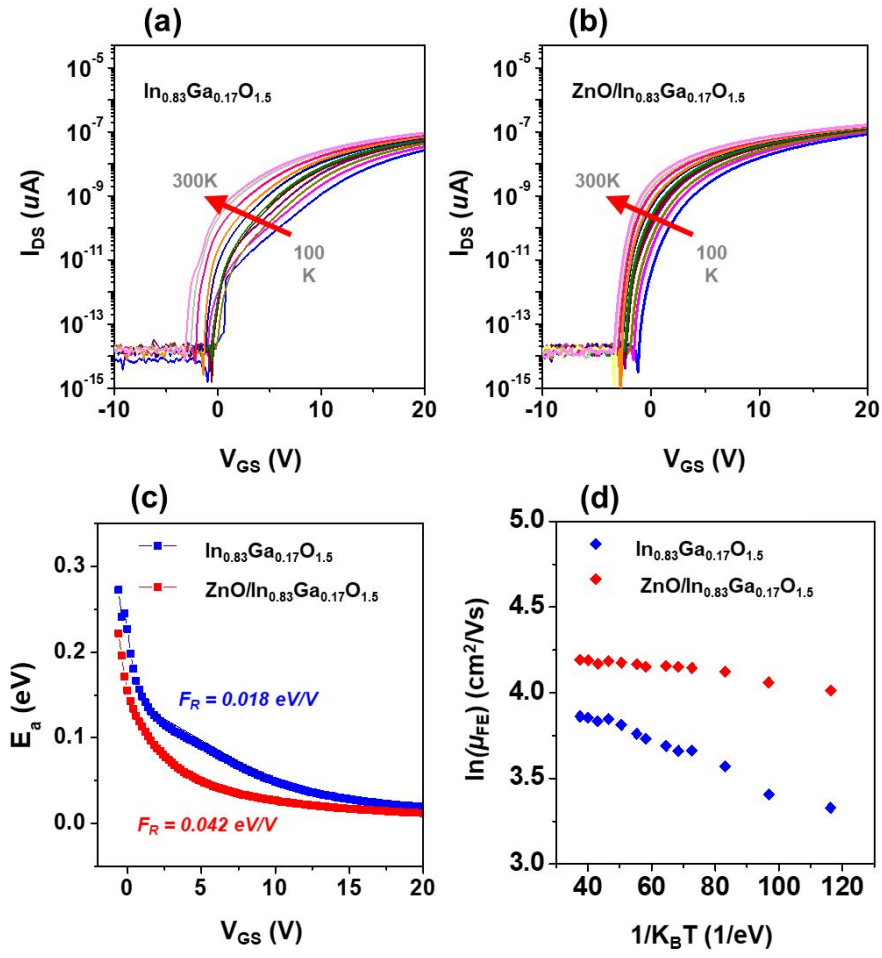

**Figure S7.** Temperature-dependent transfer characteristics for FETs with the (a)  $In_{0.83}Ga_{0.17}O_{1.5}$  and (b)  $ZnO/In_{0.83}Ga_{0.17}O_{1.5}$  channel layer in the range of 100-300 K. (c) Variation of activation energy ( $E_a$ ) of the  $I_{DS}$  vs  $V_{GS}$ . (d) Arrhenius plot between  $1/kT$  versus  $\mu_{FE}$  value.



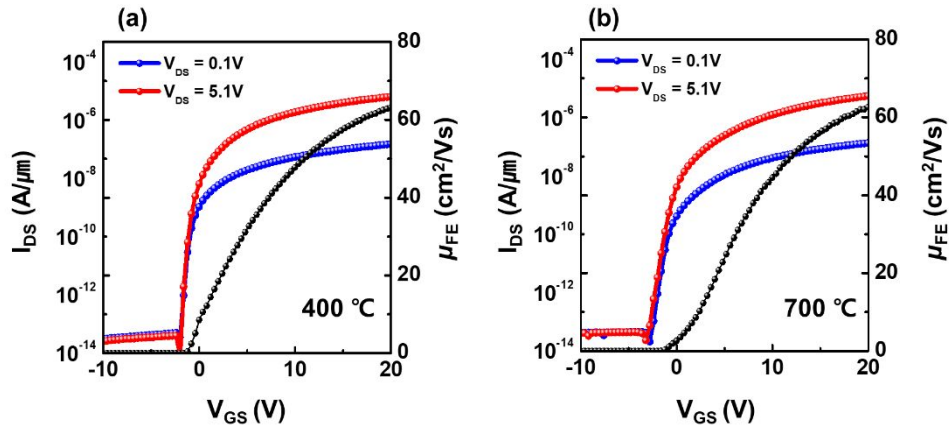

| ZnO/In <sub>0.83</sub> Ga <sub>0.17</sub> O <sub>1.5</sub> | $\mu_{FE}$<br>(cm <sup>2</sup> /(V s)) | SS<br>(V/decade) | $V_{TH}$<br>(V) | $I_{ON/OFF}$     |
|------------------------------------------------------------|----------------------------------------|------------------|-----------------|------------------|
| 400 °C                                                     | 63.2 ± 0.26                            | 0.26 ± 0.03      | -0.84 ± 0.85    | ~10 <sup>8</sup> |
| 700 °C                                                     | 62.5 ± 0.42                            | 0.52 ± 0.11      | -0.83 ± 0.88    | ~10 <sup>8</sup> |

**Figure S8.** Representative transfer characteristics of FETs with ZnO/In<sub>0.83</sub>Ga<sub>0.17</sub>O<sub>1.5</sub> heterojunction annealed at (a) 400 and (b) 700 °C. The important device parameters were summarized in Table (below).

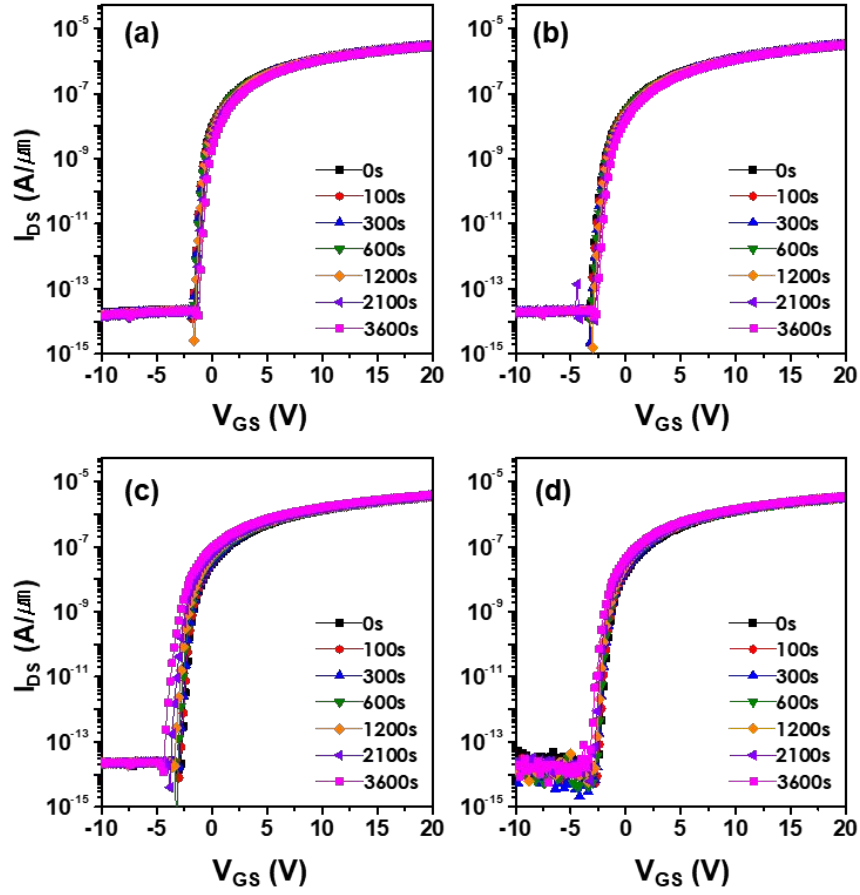

**Figure S9.** Variations in the time-dependent transfer characteristics for FETs with (a, b)  $\text{In}_{0.65}\text{Ga}_{0.35}\text{O}_{1.5}$  and (c, d)  $\text{ZnO}/\text{In}_{0.65}\text{Ga}_{0.35}\text{O}_{1.5}$  channel layers under (a, c) PBS and (b, d) NBS conditions. The stress conditions are as follows: PBS ( $V_{\text{GS}} = V_{\text{TH}} + 20 \text{ V}$ ) and NBS ( $V_{\text{GS}} = V_{\text{TH}} - 20 \text{ V}$ ).

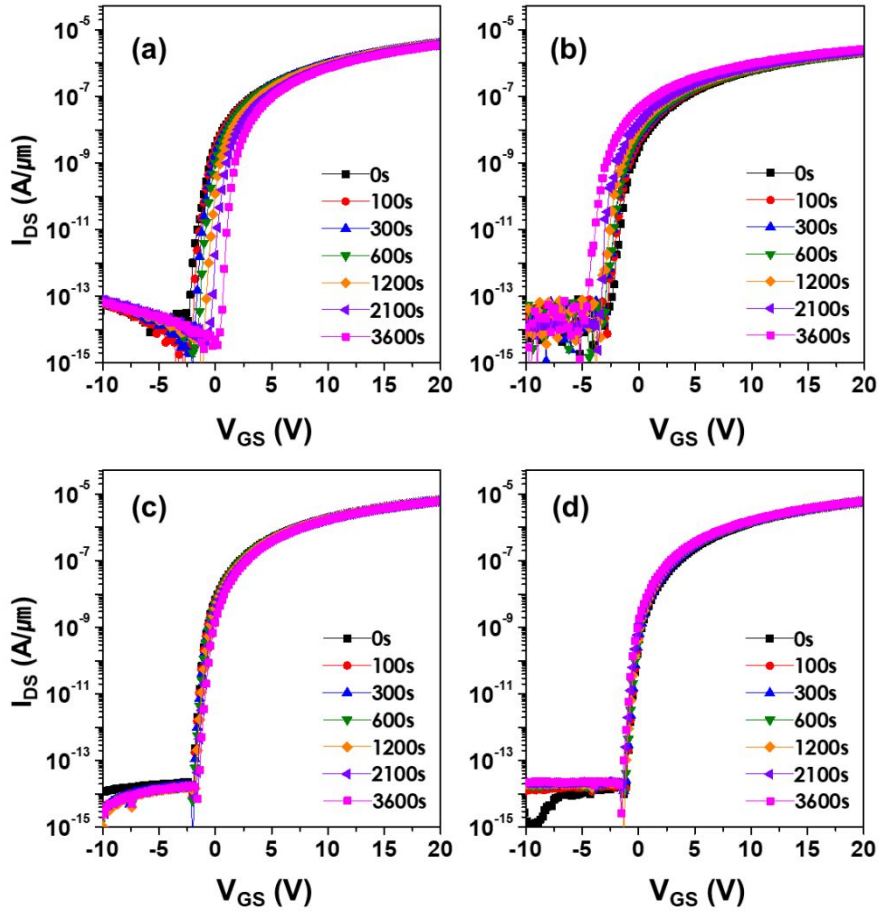

**Figure S10.** Variations in the time-dependent transfer characteristics for FETs with (a, b)  $\text{In}_{0.83}\text{Ga}_{0.17}\text{O}_{1.5}$  and (c, d)  $\text{ZnO}/\text{In}_{0.83}\text{Ga}_{0.17}\text{O}_{1.5}$  channel layers under (a, c) PBS and (b, d) NBS conditions. The stress conditions are as follows: PBS ( $V_{\text{GS}} = V_{\text{TH}} + 20 \text{ V}$ ) and NBS ( $V_{\text{GS}} = V_{\text{TH}} - 20 \text{ V}$ ).

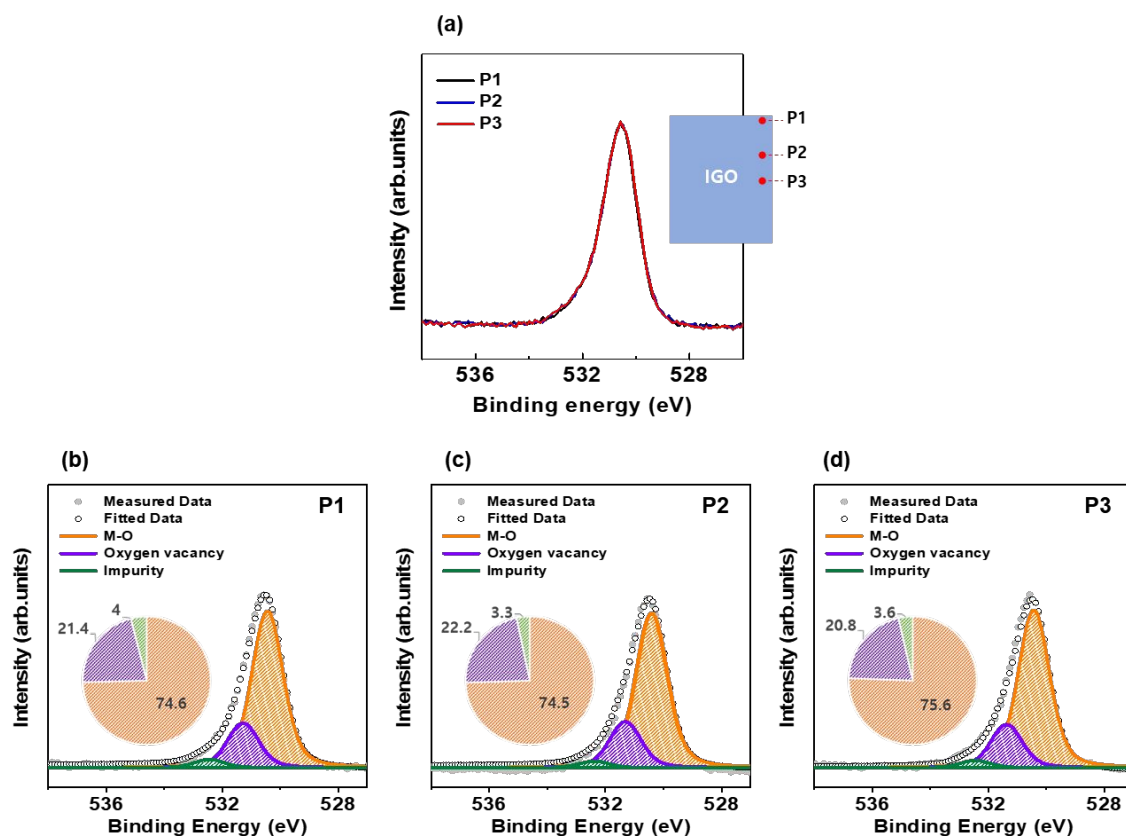

**Figure S11.** (a) O 1s XPS spectra of the  $\text{In}_{0.83}\text{Ga}_{0.17}\text{O}_{1.5}$  sample recorded at each depth position (from the surface P1 to the bulk region P3). O 1s XPS spectra at different depth positions of (b) P1, (c) P2, and (d) P3, which were de-convoluted into three different sub-peaks consisting of lattice oxygen bonded with fully coordinated metal ions, oxygen deficient regions, and impurity-related species.

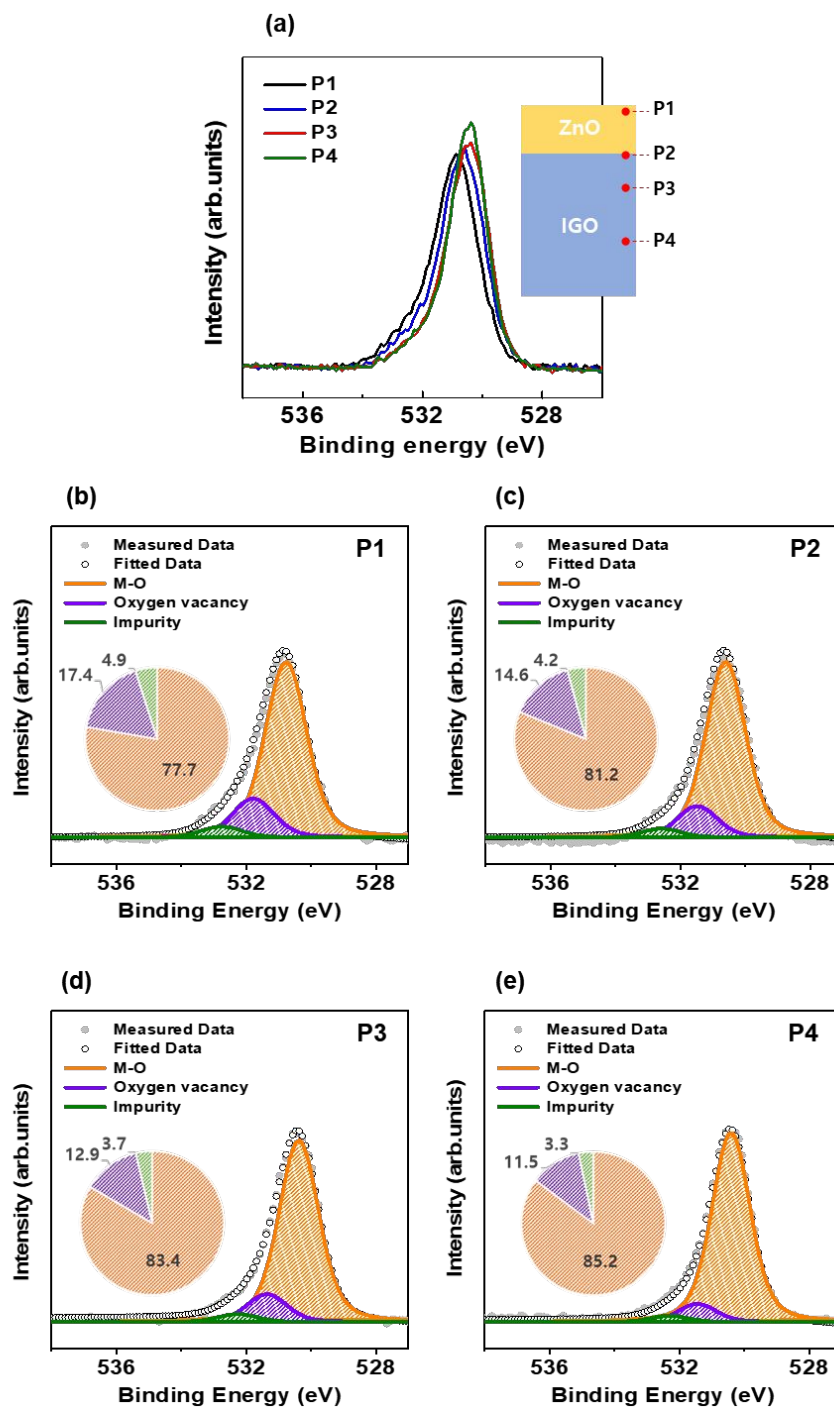

**Figure S12.** (a) O 1s XPS spectra of the ZnO/In<sub>0.83</sub>Ga<sub>0.17</sub>O<sub>1.5</sub> sample recorded at each depth position (from the surface P1 to the bulk region P4). O 1s XPS spectra at different depth positions of (b) P1, (c) P2, (d) P3, and (e) P4, which were de-convoluted into three different sub-peaks consisting of lattice

oxygen bonded with fully coordinated metal ions, oxygen deficient regions, and impurity-related species.

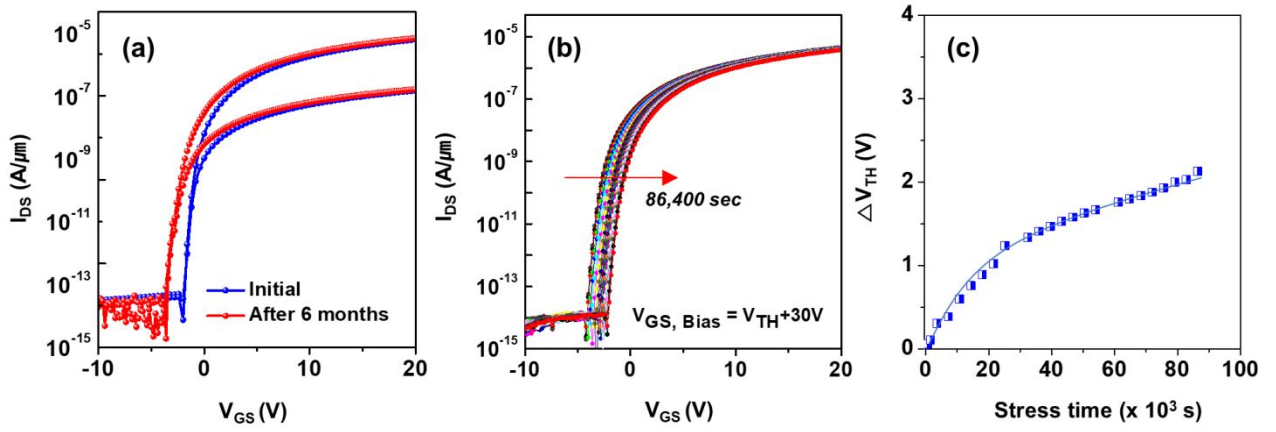

**Figure S13.** (a) Variations in transfer characteristics of the FETs with ZnO/In<sub>0.83</sub>Ga<sub>0.17</sub>O<sub>1.5</sub> heterojunction channel layer in an ambient environment for 6-months. (b) Variations in the transfer characteristics for the FET with ZnO/In<sub>0.83</sub>Ga<sub>0.17</sub>O<sub>1.5</sub> heterojunction channel layer under the gate bias of  $V_{TH} + 30$  V for 24 hours (86,400 sec). (c) Corresponding  $V_{TH}$  shift as a function of PBS stress time.

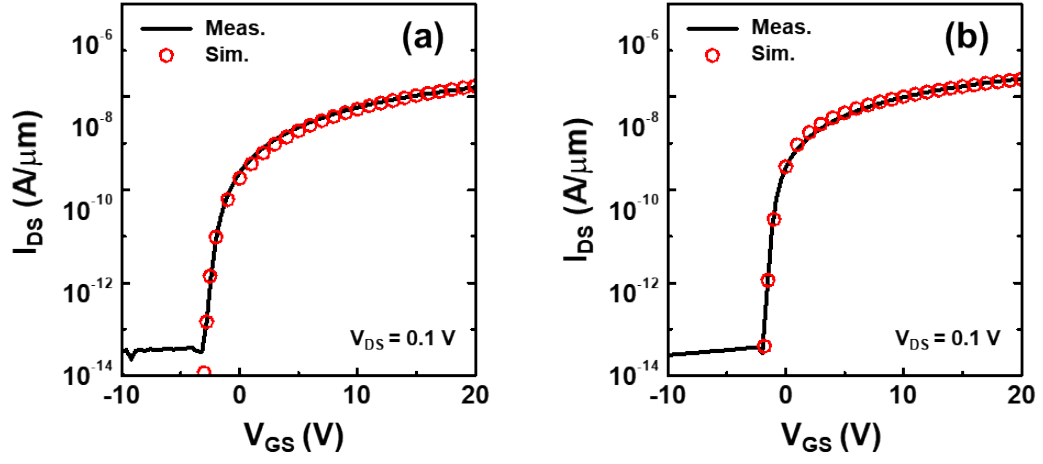

**Figure S14.** Measured and simulated transfer characteristics for FETs with the (a)  $\text{In}_{0.83}\text{Ga}_{0.17}\text{O}_{1.5}$  single channel and (b)  $\text{ZnO}/\text{In}_{0.83}\text{Ga}_{0.17}\text{O}_{1.5}$  heterojunction channel.



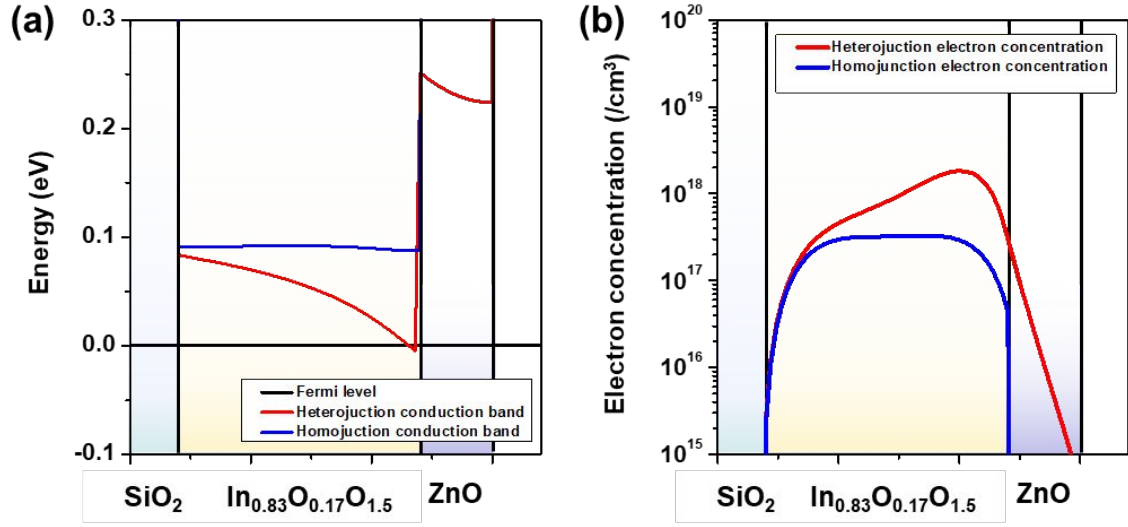

**Figure S15.** Simulated (a) energy band diagrams and (b) electron concentrations along the vertical direction from the gate dielectric/channel interface toward the back channel surface for FETs with the In<sub>0.83</sub>Ga<sub>0.17</sub>O<sub>1.5</sub> single channel and ZnO/In<sub>0.83</sub>Ga<sub>0.17</sub>O<sub>1.5</sub> heterojunction channel at flat-band conditions.

**Table S1.** Material parameters used in TCAD.

| Parameter Symbol                                             | Definition                                      | Value                 |
|--------------------------------------------------------------|-------------------------------------------------|-----------------------|
| $\mu_{\text{IGO}} (\text{cm}^2 \text{V}^{-1} \text{s}^{-1})$ | Electron mobility in the conduction band of IGO | 66                    |
| $N_{\text{e,IGO}} (\text{cm}^{-3})$                          | Doping concentration of IGO                     | $1.05 \times 10^{17}$ |
| $T_{\text{IGO}} (\text{nm})$                                 | Thickness of IGO                                | 10                    |
| $m_{\text{IGO}}^*$                                           | Electron effective mass of IGO                  | $0.34m_0$             |
| $E_{\text{g,IGO}} (\text{eV})$                               | Band gap energy of IGO                          | 3.68                  |
| $\chi_{\text{IGO}} (\text{eV})$                              | Electron affinity of IGO                        | 3.56                  |
| $\mu_{\text{ZnO}} (\text{cm}^2 \text{V}^{-1} \text{s}^{-1})$ | Electron mobility in the conduction band of ZnO | 28                    |
| $N_{\text{e,ZnO}} (\text{cm}^{-3})$                          | Doping concentration of ZnO                     | $4 \times 10^{18}$    |
| $T_{\text{ZnO}} (\text{nm})$                                 | Thickness of ZnO                                | 3                     |
| $m_{\text{ZnO}}^*$                                           | Electron effective mass of ZnO                  | $0.29m_0$             |
| $E_{\text{g,ZnO}} (\text{eV})$                               | Band gap energy of ZnO                          | 3.98                  |
| $\chi_{\text{ZnO}} (\text{eV})$                              | Electron affinity of ZnO                        | 3.30                  |

**Table S2.** Electrical parameters of the subgap density of states used in TCAD. The density of states for each subgap was modeled to have two exponential functions of acceptor-like states (i.e.,  $g_{TA}$  and  $g_{DA}$ ) and one Gaussian function of donor-like states ( $g_{OV}$ ), respectively. The formulas are as follows:

$$g_{total}(E) = g_{TA}(E) + g_{DA}(E) + g_{OV}(E)$$

$$= N_{TA} \exp\left(-\frac{Ec - E}{kT_{TA}}\right) + N_{DA} \exp\left(-\frac{Ec - E}{kT_{DA}}\right) + N_{OV} \exp\left(-\left(\frac{EOV - E}{kT_{OV}}\right)^2\right).$$

| Parameter<br>Symbol                                     | Definition                                                               | Value                |
|---------------------------------------------------------|--------------------------------------------------------------------------|----------------------|
| $N_{TA.homo.}$<br>( $\text{cm}^{-3} \text{eV}^{-1}$ )   | Density of the acceptor-like tail state of the IGO FET                   | $1.7 \times 10^{20}$ |
| $kT_{TA.homo.}$ (eV)                                    | Characteristic energy of the acceptor-like tail state of the IGO FET     | 0.011                |
| $N_{DA.homo.}$<br>( $\text{cm}^{-3} \text{eV}^{-1}$ )   | Density of the acceptor-like deep state of the IGO FET                   | $8.0 \times 10^{18}$ |
| $kT_{DA.homo.}$ (eV)                                    | Characteristic energy of the acceptor-like deep state of the IGO FET     | 0.12                 |
| $N_{OV.homo.}$<br>( $\text{cm}^{-3} \text{eV}^{-1}$ )   | Density of the shallow oxygen vacancy state of the IGO FET               | $1.2 \times 10^{19}$ |
| $kT_{OV.homo.}$ (eV)                                    | Characteristic energy of the shallow oxygen vacancy state of the IGO FET | 0.1                  |
| $E_{OV.homo.}$ (eV)                                     | Mean energy of the shallow oxygen vacancy state of the IGO FET from Ec   | 0.05                 |
| $N_{TA.hetero.}$<br>( $\text{cm}^{-3} \text{eV}^{-1}$ ) | Density of the acceptor-like tail state of the ZnO/IGO FET               | $1.0 \times 10^{20}$ |
| $kT_{TA.hetero.}$ (eV)                                  | Characteristic energy of the acceptor-like tail state of the ZnO/IGO FET | 0.011                |
| $N_{DA.hetero.}$<br>( $\text{cm}^{-3} \text{eV}^{-1}$ ) | Density of the acceptor-like deep state of the ZnO/IGO FET               | $7.0 \times 10^{18}$ |
| $kT_{DA.hetero.}$ (eV)                                  | Characteristic energy of the acceptor-like deep state of the ZnO/IGO FET | 0.12                 |
| $N_{OV.hetero.}$<br>( $\text{cm}^{-3} \text{eV}^{-1}$ ) | Density of the shallow oxygen vacancy state of the ZnO/IGO FET           | $7.3 \times 10^{17}$ |

|                                |                                                                               |      |
|--------------------------------|-------------------------------------------------------------------------------|------|
| $kT_{\text{OV, hetero.}}$ (eV) | Characteristic energy of the shallow oxygen vacancy state of the ZnO/IGO FET  | 0.10 |
| $E_{\text{OV, hetero.}}$ (eV)  | Mean energy of the shallow oxygen vacancy state of the ZnO/IGO FET from $E_c$ | 0.05 |

---
